# Supplementary material for: Prevalence of common carbapenemase genes and multidrug resistance among uropathogenic Escherichia coli phylogroup B2 isolates from outpatients in Wasit Province/ Iraq
Source: PubMed Central journal article supplement (PMC8789106; doi:10.1371/journal.pone.0262984), 2022-01-25
Supplement: pone.0262984.s001.pdf [file pone.0262984.s001.pdf]

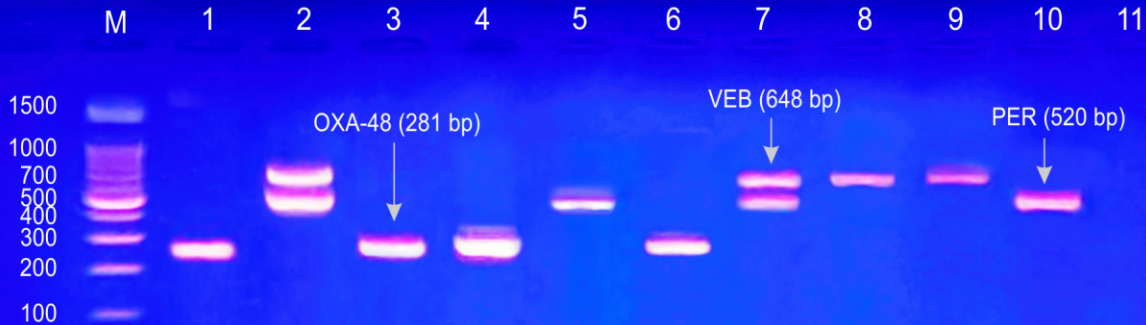

**Fig 1**

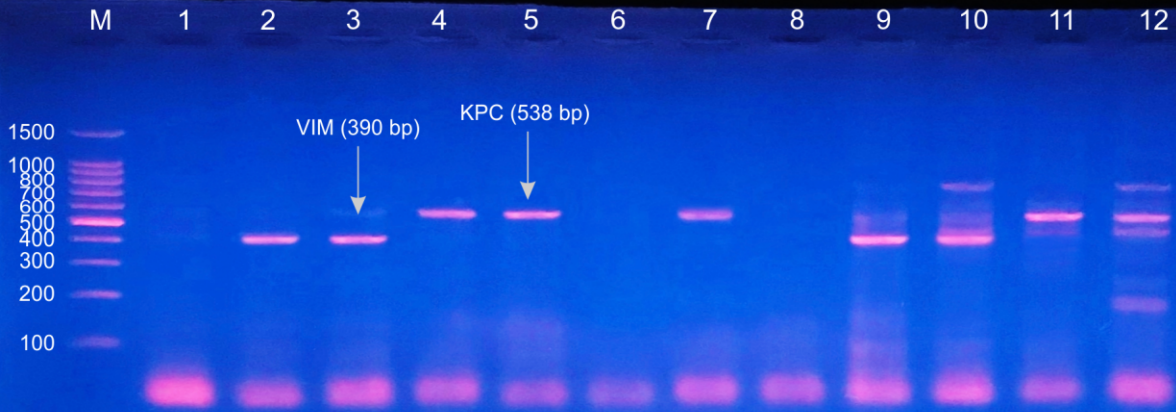

**Fig 2**
